# Supplementary material for: Short-acting insulin analogues versus regular human insulin on postprandial glucose and hypoglycemia in type 1 diabetes mellitus: a systematic review and meta-analysis
Source: Diabetol Metab Syndr. 2019 Jan 3;11:2. doi: 10.1186/s13098-018-0397-3 (PMC6317184; doi:10.1186/s13098-018-0397-3)
Supplement: Supplementary file 4 — Additional file 4: Table S2. Characteristics and Quality Of Studies. [file 13098_2018_397_MOESM4_ESM.xls]

## Sheet: Planilha1
Table S2. Characteristics and Quality Of Studies
Analogue Insulin x Regular Human Insulin
Patient or population: DM1 patients
Settings: Outpatient
Intervention: Short-Acting Insulin Analogue x Regular Human Insulin
Outcomes	Illustrative comparative risks* (95% CI)		Relative effect	No of Participants	Quality of the evidence	Comments
	Assumed risk	Corresponding risk	(95% CI)	(studies)	(GRADE)
	Regular Insulin	Analogue Insulin
Post-Prandial - General (mg/dl)	The mean post-prandial general (mg/dL) in the control groups was 168.06 mg/dL	The mean post-prandial general (mg/dL) in the intervention groups was 19.45 mg/dL lower	Not estimable	5031 (15 studies)	⊕⊕⊝⊝
Follow-up: 1-16 months		(21.53 to 17.38 lower)			low1,2
Hypoglycemic Episodes (Risk Ratio) Follow-up: 1 - 16 months	-	-	Not estimable	6619 (22 studies)	⊕⊕⊝⊝
					very low5,6
Glycated Hemoglobin (%)	The mean glycated hemoglobin (%) in the control groups was	The mean glycated hemoglobin (%) in the intervention groups was	Not estimable	5374 (16 studies)	⊕⊕⊝⊝
Follow-up: 3-16 months	843.75	0.13 lower			low3,4
		(0.16 to 0.1 lower)
Nocturnal Hypoglycemia (Risk Ratio) Follow-up: 3 -4 months	-	-	Not estimable	1995 (8 studies)	⊕⊕⊝⊝
					verylow7,8
Severe Hypoglycemia (Risk Ratio) Follow-up: 1 - 16 months	-	-	Not estimable	5945 (15 studies)	⊕⊕⊕⊝
					moderate9
*The basis for the assumed risk (e.g. the median control group risk across studies) is provided in footnotes. The corresponding risk (and its 95% confidence interval) is based on the assumed risk in the comparison group and the relative effect of the intervention (and its 95% CI). CI: Confidence interval;
GRADE Working Group grades of evidence
High quality: Further research is very unlikely to change our confidence in the estimate of effect.
Moderate quality: Further research is likely to have an important impact on our confidence in the estimate of effect and may change the estimate.
Low quality: Further research is very likely to have an important impact on our confidence in the estimate of effect and is likely to change the estimate.
Very low quality: We are very uncertain about the estimate.
