# Supplementary material for: Short-acting insulin analogues versus regular human insulin on postprandial glucose and hypoglycemia in type 1 diabetes mellitus: a systematic review and meta-analysis
Source: Diabetol Metab Syndr. 2019 Jan 3;11:2. doi: 10.1186/s13098-018-0397-3 (PMC6317184; doi:10.1186/s13098-018-0397-3)
Supplement: Supplementary file 6 — Additional file 6: Table S3. Analysis of risk of bias of the selected studies. [file 13098_2018_397_MOESM6_ESM.xls]

## Sheet: Planilha1
Table S3. Bias Risk Analysis of the Included Studies
Study	Generating Randomization	Allocation Concealment	Blinding of Participants and Personnel (Objective Outcomes)	Blinding of Participants and Personnel (Subjective Outcomes)	Blinding of Outcome Assessment (Objective Outcomes)	Blinding of Outcome Assessment (Subjective Outcomes)	Incomplete Outcome Data	Selective Reporting	Other Bias
Anderson et al, 1997	Uncertain	Uncertain	Low	High	Low	High	Uncertain	Low	Low
	(not described)	(not described)	(open study, glycated hemoglobin and post-prandial glycemia registered by the laboratory)	(open study, subjective outcomes could be influenced by the lack of blinding of the participants)	(open study, but no objective outcome was dependent on the personnel observation)	(open study, subjective outcomes could be influenced by the lack of blinding of the personnel)	(not described)	(all suggested outcomes were reported)	(no other source of bias was detected)
Annuzzi et al, 2001*	Low	Low	Low	High	Low	High	Low	Low	Low
	(the method was described)	(the method was described))	(open study, glycated hemoglobin registered by the laboratory)	(open study, subjective outcomes could be influenced by the lack of blinding of the participants)	(open study, glycated hemoglobin registered by the laboratory)	(open study, subjective outcomes could be influenced by the lack of blinding of the participants)	(losses were properly described)	(all suggested outcomes were reported)	(no other source of bias was detected)
Brock Jacobsen et al, 2011	Uncertain	Uncertain	Low	Low	Low	Low	Uncertain	Low	Low
	(not described)	(not described)	(double blind, all insulin applied by the same pen model and at the same timetable)	(double blind, all insulin applied by the same pen model and at the same timetable)	(double blind, all insulin applied by the same pen model and at the same timetable)	(double blind, all insulin applied by the same pen model and at the same timetable)	(there was a 12,5% of loss. The reasons were not clear – “personal reasons”)	(all suggested outcomes were reported)	(no other source of bias was detected)
Cherubini et al, 2006	Uncertain	Uncertain	Low	High	Low	High	Uncertain	Low	Uncertain
	(not described)	(not described)	(open study, glycated hemoglobin registered by the laboratory)	(open study, subjective outcomes could be influenced by the lack of blinding of the participants)	(open study, glycated hemoglobin registered by the laboratory)	(open study, subjective outcomes could be influenced by the lack of blinding of the personnel)	(not described)	(all suggested outcomes were reported)	(baseline characteristics of the groups were not reported)
Danne et al, 2007	Uncertain	Uncertain	Low	High	Low	High	High	High	Uncertain (baseline characteristics of the groups were not reported)
	(not described)	(not described)	(open study, glycated hemoglobin registered by the laboratory)	(open study, subjective outcomes could be influenced by the lack of blinding of the participants)	(open study, but no objective outcome was dependent on the personnel observation)	(open study, subjective outcomes could be influenced by the lack of blinding of the personnel)	(2 patients were excluded with no detailed reasons, and 2 others had their data excluded from analysis)	(lacks data from a whole group at the second crossover phase)
Fairchild et al, 2000	Uncertain	Uncertain	Low	High	Low	High	Low	Low	Low
	(not described)	(not described)	(open study, glycated hemoglobin registered by the laboratory)	(open study, subjective outcomes could be influenced by the lack of blinding of the participants)	(open study, but no objective outcome was dependent on the personnel observation)	(open study, subjective outcomes could be influenced by the lack of blinding of the personnel)	(no losses)	(all suggested outcomes were reported)	(no other source of bias was detected)
Ferguson et al, 2001	Uncertain	Uncertain	Low	Low	Low	Low	High	Low	Low
	(not described)	(not described)	(open study, glycated hemoglobin registered by the laboratory)	(filling out of the questionnaires and evaluation of records in the glucometer)	(open study, glycated hemoglobin registered by the laboratory)	(filling out of the questionnaires by the patients and evaluation of records in the glucometer)	(15% of losses, does not mention how many from each group)	(all suggested outcomes were reported)	(no other source of bias was detected)
Ford-Adams et al, 2003	Uncertain	Low	Low	High	Low	High	Low	Low	Uncertain (baseline characteristics of the groups were not reported)
	(not described)	(opaque and sealed envelopes)	(open study, glycated hemoglobin and nocturnal glycemia registered by the laboratory)	(open study, subjective outcomes could be influenced by the lack of blinding of the participants)	(open study, glycated hemoglobin and nocturnal glycemia registered by the laboratory)	(open study, subjective outcomes could be influenced by the lack of blinding of the personnel)	(no losses)	(all suggested outcomes were reported)
Gale et al, 2000	Uncertain	Uncertain	Low	Low	Low	Low	Low	Low	Uncertain (baseline characteristics of the groups were not reported)
	(not described)	(not described)	(double blind, same pen, blinding of the refill)	(double blind, same pen, blinding of the refill)	(double blind, same pen, blinding of the refill)	(double blind, same pen, blinding of the refill)	(few losses with well described reasons)	(all suggested outcomes were reported)
Garg et al, 2005	Uncertain	Uncertain	Low	High	Low	High	Uncertain	Low	Low
	(not described)	(not described)	(open study, glycated hemoglobin registered by the laboratory)	(open study, subjective outcomes could be influenced by the lack of blinding of the participants)	(open study, glycated hemoglobin registered by the laboratory)	(open study, subjective outcomes could be influenced by the lack of blinding of the personnel)	(A loss of 7,3%; number and reasons by group were not reported)	(all suggested outcomes were reported)	(no other source of bias was detected)
Heller et al, 1999	Uncertain	Uncertain	Low	High	Low	High	Low	Low	Low
	(not described)	(not described)	(open study, glycated hemoglobin and blood glucose registered by the laboratory, severe hypoglycemia episode)	(open study, subjective outcomes could be influenced by the lack of blinding of the participants)	(open study, but no outcome was dependent on the personnel observation)	(open study, subjective outcomes could be influenced by the lack of blinding of the personnel)	(no loss at the study’s first phase)	(all suggested outcomes were reported)	(no other source of bias was detected)
Heller et al, 2004	Low	Low	Low	Low	Low	Low	Low	Low	Low
	(software)	(telephone central)	(double blind, all insulin applied by the same pen model and at the same timetable)	(double blind, all insulin applied by the same pen model and at the same timetable)	(double blind, all insulin applied by the same pen model and at the same timetable)	(double blind, all insulin applied by the same pen model and at the same timetable)	(<10% of losses, similar number and reasons on the two groups)	(all suggested outcomes were reported)	(no other source of bias was detected)
Holcombe et al, 2002	Uncertain	Uncertain	Low	High	Low	High	Low	Low	Low
	(not described)	(not described)	(open study, glycated hemoglobin)	(open study, subjective outcomes could be influenced by the lack of blinding of the participants)	(open study, glycated hemoglobin, glycemia, sever hypoglycemia episode)	(open study, subjective outcomes could be influenced by the lack of blinding of the personnel)	(<1,5% of losses, similar number and reasons on the two groups)	(all suggested outcomes were reported)	(no other source of bias was detected)
Holleman et al, 1997	Uncertain	Uncertain	Low	High	Low	High	Uncertain	Low	Low
	(not described)	(not described)	(open study, glycated hemoglobin registered by the laboratory)	(open study, subjective outcomes could be influenced by the lack of blinding of the participants)	(open study, glycated hemoglobin registered by the laboratory)	(open study, subjective outcomes could be influenced by the lack of blinding of the personnel)	(there were 5 losses for each group, but the mean reasons were not discriminated by group)	(all suggested outcomes were reported)	(no other source of bias was detected)
Home et al, 1998	Uncertain	Uncertain	Low	High	Low	High	Uncertain	Low	Low
	(not described)	(not described)	(open study, post-prandial glycemia registered in the glucometer, glycated hemoglobin registered by the laboratory)	(open study, subjective outcomes could be influenced by the lack of blinding of the participants)	(open study, post-prandial glycemia registered in the glucometer, glycated hemoglobin registered by the laboratory)	(open study, subjective outcomes could be influenced by the lack of blinding of the personnel)	(13,5% of total losses, but the mean reasons were not discriminated by group)	(all suggested outcomes were reported)	(no other source of bias was detected)
Home et al, 2000	Uncertain	Uncertain	Low	High	Low	High	Low	Low	Low
	(not described)	(not described)	(open study, glycated hemoglobin registered by the laboratory)	(open study, subjective outcomes could be influenced by the lack of blinding of the participants)	(open study, glycated hemoglobin registered by the laboratory)	(open study, subjective outcomes could be influenced by the lack of blinding of the personnel)	(similar number and reasons of losses on the two groups)	(all suggested outcomes were reported)	(no other source of bias was detected)
Jacobs et al, 1997	Uncertain	Uncertain	Low	High	Low	High	Uncertain	Low	Low
	(not described)	(not described)	(open study, glycated hemoglobin registered by the laboratory)	(open study, subjective outcomes could be influenced by the lack of blinding of the participants)	(open study, glycated hemoglobin registered by the laboratory)	(open study, subjective outcomes could be influenced by the lack of blinding of the personnel)	(not described)	(all suggested outcomes were reported)	(no other source of bias was detected)
Provenzano et al, 2001	Low	Uncertain	Low	High	Low	High	Uncertain	Low	Low
	(a software generated the table for allocation concealment)	(not described)	(open study, post-prandial glycemia and glycated hemoglobin registered by the laboratory)	(open study, subjective outcomes could be influenced by the lack of blinding of the participants)	(open study, post-prandial glycemia and glycated hemoglobin registered by the laboratory)	(open study, subjective outcomes could be influenced by the lack of blinding of the personnel)	(not described)	(all suggested outcomes were reported)	(no other source of bias was detected)
Raskin et al, 2000	Uncertain	Uncertain	Low	High	Low	High	Low	Low	Low
	(not described	(not described	(open study, glycated hemoglobin registered by the laboratory)	(open study, subjective outcomes could be influenced by the lack of blinding of the participants)	(open study, glycated hemoglobin registered by the laboratory)	(open study, subjective outcomes could be influenced by the lack of blinding of the personnel)	(similar losses on both groups – 12% versus 12,2% - and their reasons were also similar)	(all suggested outcomes were reported)	(no other source of bias was detected)
Tamas et al, 2001	Uncertain	Low	Low	High	Low	High	Uncertain	Uncertain	Low
	(not described)	(telephone central)	(open study, glycated hemoglobin registered by the laboratory)	(open study, subjective outcomes could be influenced by the lack of blinding of the participants)	(open study, glycated hemoglobin registered by the laboratory)	(open study, subjective outcomes could be influenced by the lack of blinding of the personnel)	(2,5% and 6% of losses on the compared groups, but the mean reasons were not described)	(post-prandial glycemia after lunch was not described)	(no other source of bias was detected
Tupola et al, 2001	Uncertain	Uncertain	Low	High	Low	High	Uncertain	Low	Low
	(not described)	(not described)	(open study, glycated hemoglobin registered on the glucometer)	(open study, subjective outcomes could be influenced by the lack of blinding of the participants)	(open study, glycated hemoglobin registered by the laboratory)	(open study, subjective outcomes could be influenced by the lack of blinding of the personnel)	(An 8% of losses, not mentioning how many per group)	(all suggested outcomes were reported)	(no other source of bias was detected
Valle et al, 2001	Uncertain	Uncertain	Low	High	Low	High	Low	Low	Uncertain
	(not described)	(not described)	(open study, post-prandial glycemia and glycated hemoglobin registered on the glucometer and by the laboratory)	(open study, subjective outcomes could be influenced by the lack of blinding of the participants)	(open study, post-prandial glycemia and glycated hemoglobin registered on the glucometer and by the laboratory)	(open study, subjective outcomes could be influenced by the lack of blinding of the personnel)	(no losses)	(all suggested outcomes were reported)	(unable to check if both groups were similar at the baseline)
* Data of this study was taken from Siebenhorfer et al, 2006
